# Supplementary material for: The Role of Vegetation on Urban Atmosphere of Three European Cities—Part 1: Evaluation of Vegetation Impact on Meteorological Conditions
Source: MDPI journal article supplement (doi:10.3390/f14061235), 2023-06-14
Supplement: s1 [file s1]

Archive with 1 entries (1 files):
- forests-2426024-supplementary.pdf
