# Supplementary material for: The Role of Vegetation on Urban Atmosphere of Three European Cities—Part 1: Evaluation of Vegetation Impact on Meteorological Conditions
Source: MDPI journal article supplement (doi:10.3390/f14061235), 2023-06-14
Supplement: s1 [file s1 › forests-2426024-supplementary.pdf]

## Support Information

### The role of vegetation on the urban atmosphere of three European cities. Part 1: Evaluation of vegetation impact on meteorological conditions

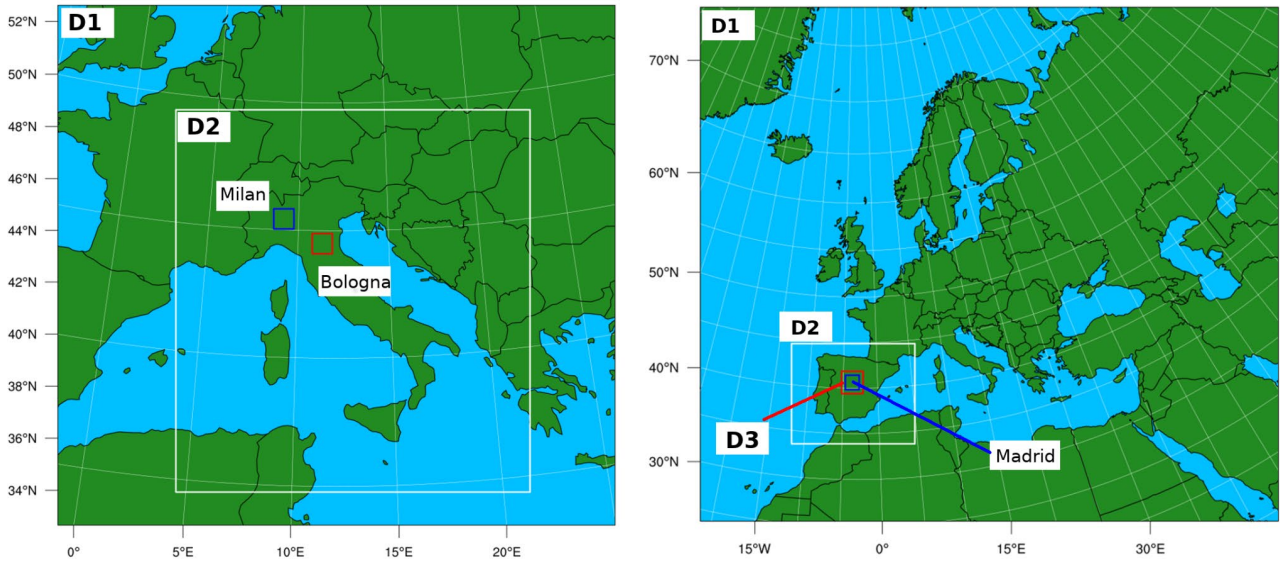

**Figure S1.** Domains used for simulations over Italy (Milano and Bologna, left) and Spain (Madrid, right).

**Table S1.** Domain specifications.

| Italy   | Geographic area      | Grid Dimension<br>(points)<br>lon x lat | Horizontal resolution(km)  |
|---------|----------------------|-----------------------------------------|----------------------------|
| D1      | Europe               | 204 x 190                               | 12 x 12                    |
| D2      | Italy                | 388 x 418                               | 4 x 4                      |
| Bologna | Bologna Municipality | 89 x 89                                 | 1 x 1                      |
| Milan   | Milan Municipality   | 89 x 89                                 | 1 x 1                      |
| Spain   | Geographical area    | Grid Dimension<br>(points)<br>lon x lat | Horizontal resolution (km) |
| D1      | Europe               | 248 x 220                               | 27 x 27                    |

|               |                     |           |       |
|---------------|---------------------|-----------|-------|
| <b>D2</b>     | Iberian Peninsula   | 159 x 129 | 9 x 9 |
| <b>D3</b>     | Spain central area  | 84 x 87   | 3 x 3 |
| <b>Madrid</b> | Greater Madrid area | 159 x 168 | 1 x 1 |

**Table S2.** WRF statistical scores over Bologna, Milano and Madrid [34] computed for temperature (T), relative humidity (RH) and wind speed (WS) against local networks surface observations.

|                   | <b>Bologna</b> |       |           | <b>Milano</b> |       |         | <b>Madrid</b> |       |           |
|-------------------|----------------|-------|-----------|---------------|-------|---------|---------------|-------|-----------|
|                   | T              | RH    | WS        | T             | RH    | WS      | T             | RH    | WS        |
| <b>BIAS</b>       | 0.96°C         | -5%   | -0.62 m/s | 0.85°C        | -9.6% | 0.1 m/s | 2°C           | -0.3% | -0.12 m/s |
| <b>CORR</b>       | 0.96           | 0.78  | 0.48      | 0.97          | 0.76  | 0.53    | 0.97          | 0.88  | 0.51      |
| <b>RMSE</b>       | 2.5°C          | 14.7% | 1.0 m/s   | 2.5°C         | 17.7% | 1.0 m/s | 3.2°C         | 10.8% | 1.0 m/s   |
| <b>IOA</b>        | 0.97           | 0.86  | 0.64      | 0.98          | 0.82  | 0.62    | 0.84          | 0.8   | 0.53      |
| <b>Mean model</b> | 15.4°C         | 65.8% | 1.74 m/s  | 15.3 °C       | 63.7% | 1.3 m/s | 16.3°C        | 52.2% | 1.1 m/s   |
| <b>Mean Obs</b>   | 14.2 °C        | 72.0% | 2.35 m/s  | 14.3 °C       | 73.3% | 1.2 m/s | 14.3°C        | 52.5% | 1.2 m/s   |

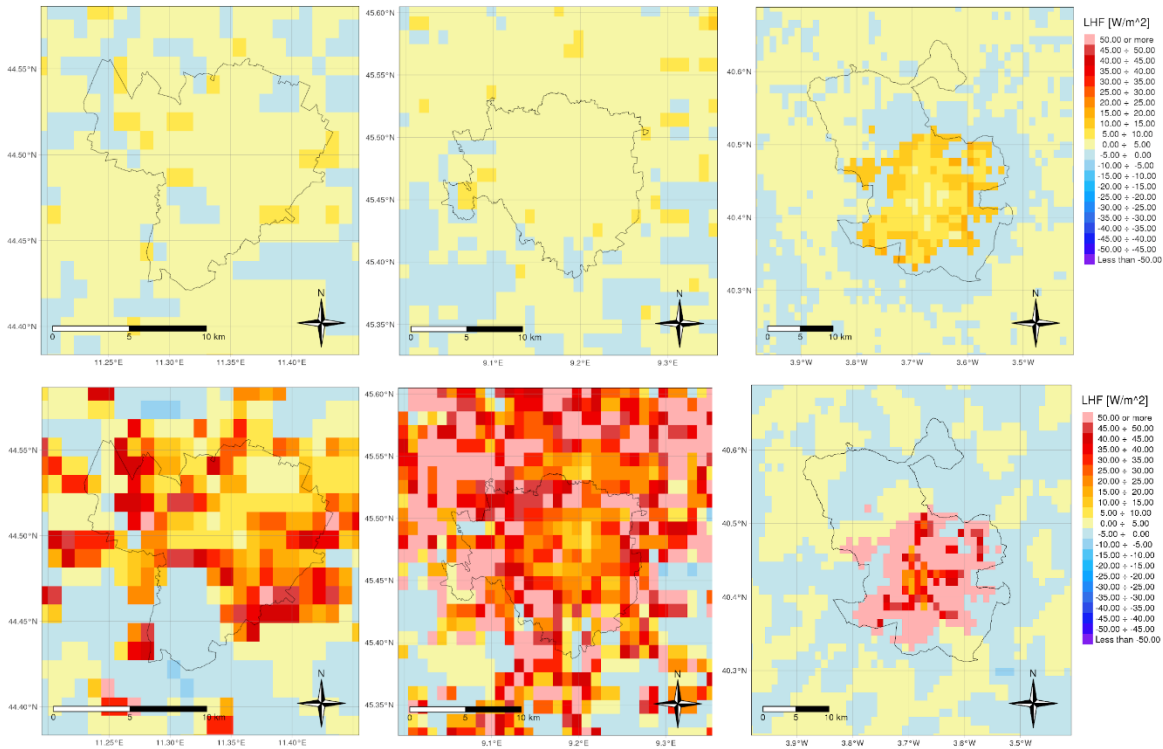

**Figure S2.** Average difference (VEG-NOVEG) for Latent Heat Flux (LHF,  $\text{W/m}^2$ ), for January (top row) and July (bottom row), referred to Bologna (left column), Milano (middle column) and Madrid (right column).

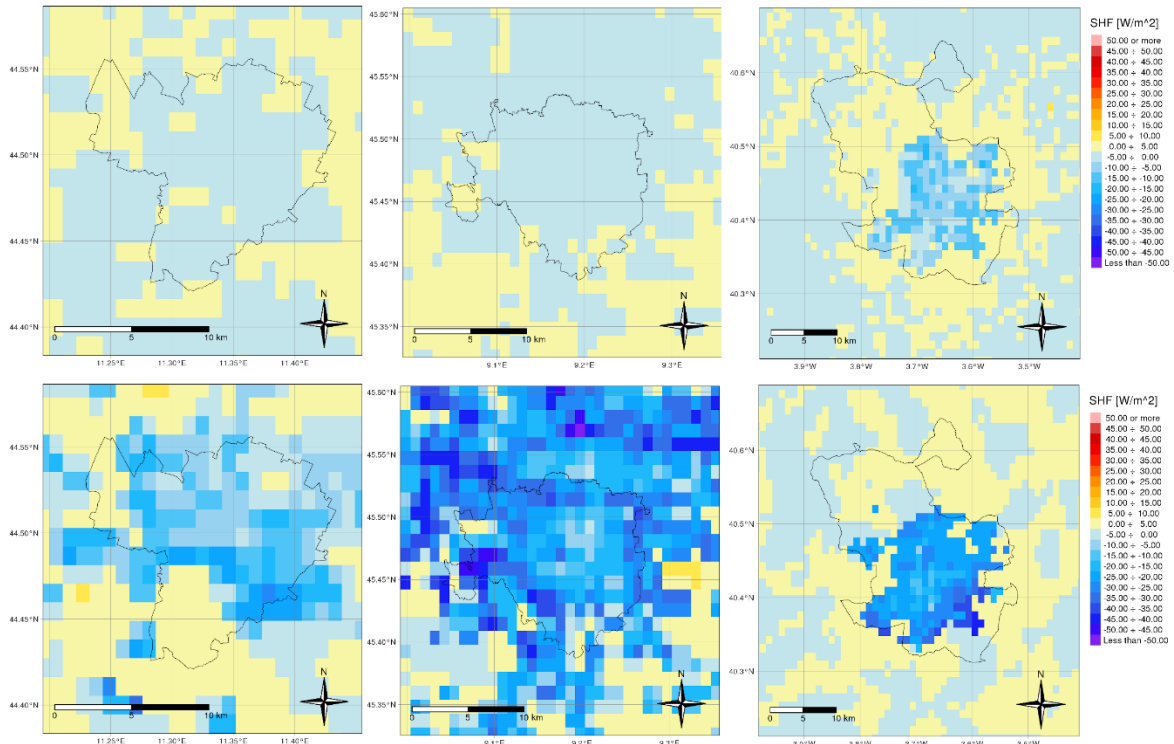

**Figure S3.** Same as in Figure S2 but referred to Sensible Heat Flux (SHF).

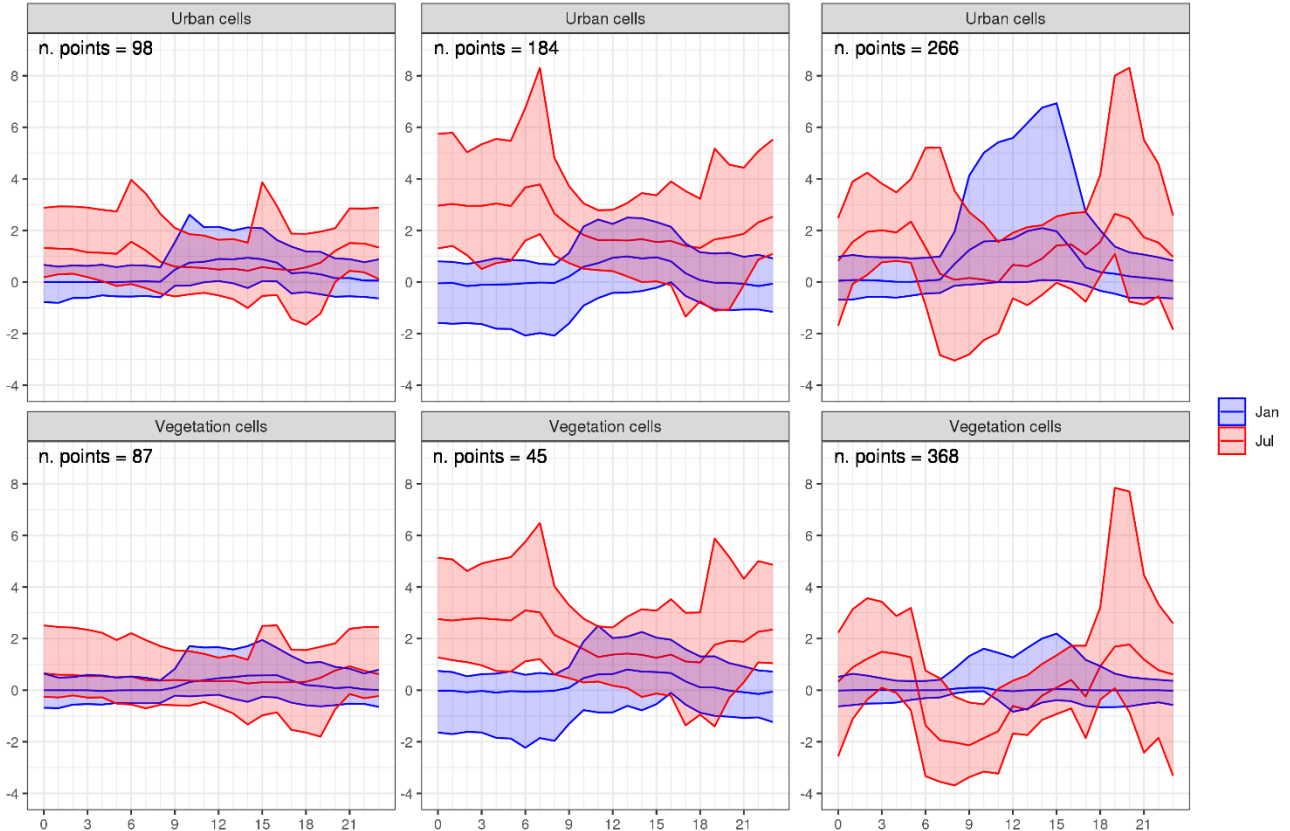

**Figure S4.** Daily cycle of the median, 10<sup>th</sup> and 90<sup>th</sup> percentiles RH difference (VEG-NOVEG) within Bologna, Milano and Madrid municipalities (left, middle and right column, respectively). Top row is referred to quantities calculated over

Urban cells where vegetation fraction was removed in NOVEG simulations, while bottom row shows quantities calculated over Vegetation cells where urban fraction is not prevalent and vegetation fraction was unchanged in both simulations. Colours refer to January (blue) and July (red), while shaded areas encompass the interval between 90<sup>th</sup> (upper bound) and 10<sup>th</sup> (lower bound) percentile. Units in %. The number of grid points associated with cell type is indicated in the panels.

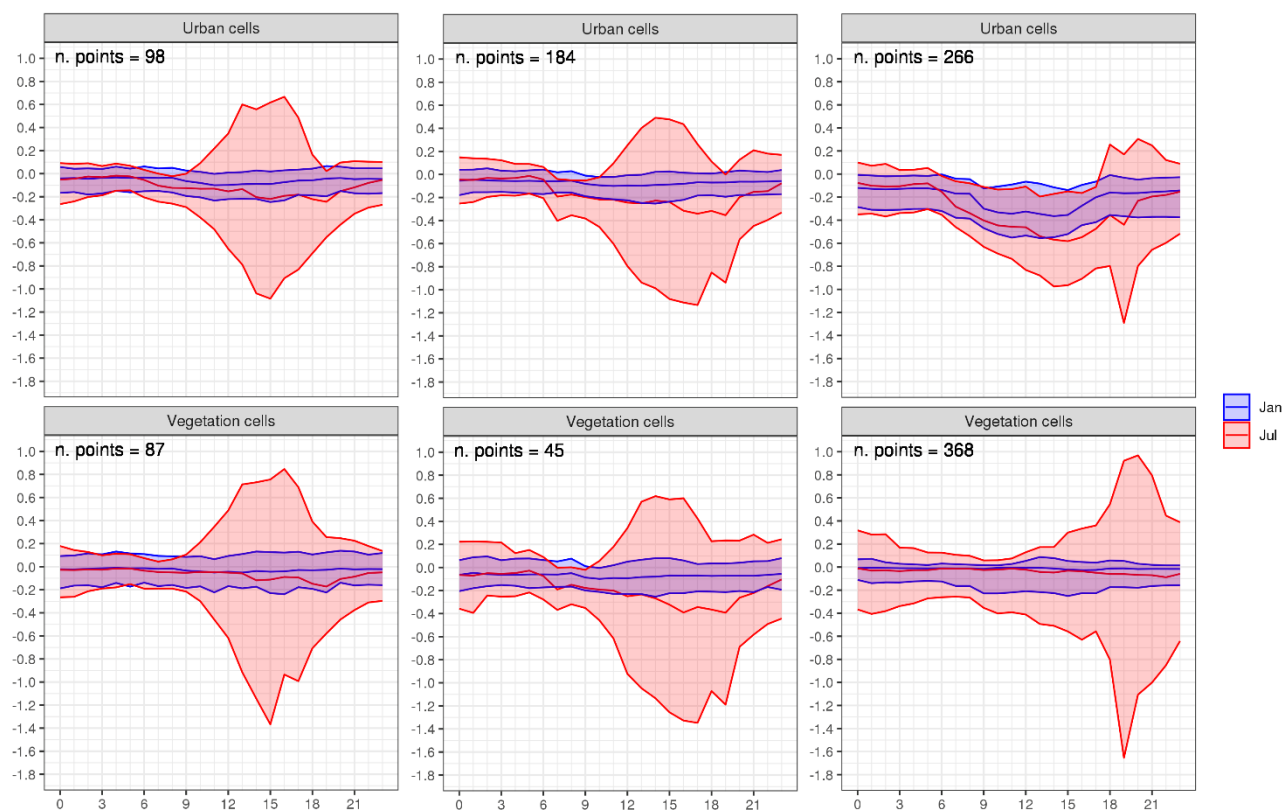

**Figure S5.** Daily cycle of the median, 10<sup>th</sup> and 90<sup>th</sup> percentiles WS difference (VEG-NOVEG) within Bologna, Milano and Madrid municipalities (left, middle and right column, respectively). Top row is referred to quantities calculated over Urban cells where vegetation fraction was removed in NOVEG simulations, while bottom row shows quantities calculated over Vegetation cells where urban fraction is not prevalent and vegetation fraction was unchanged in both simulations. Colours refer to January (blue) and July (red), while shaded areas encompass the interval between 90<sup>th</sup> (upper bound) and 10<sup>th</sup> (lower bound) percentile. Units in m/s. The number of grid points associated with cell type is indicated in the panels.

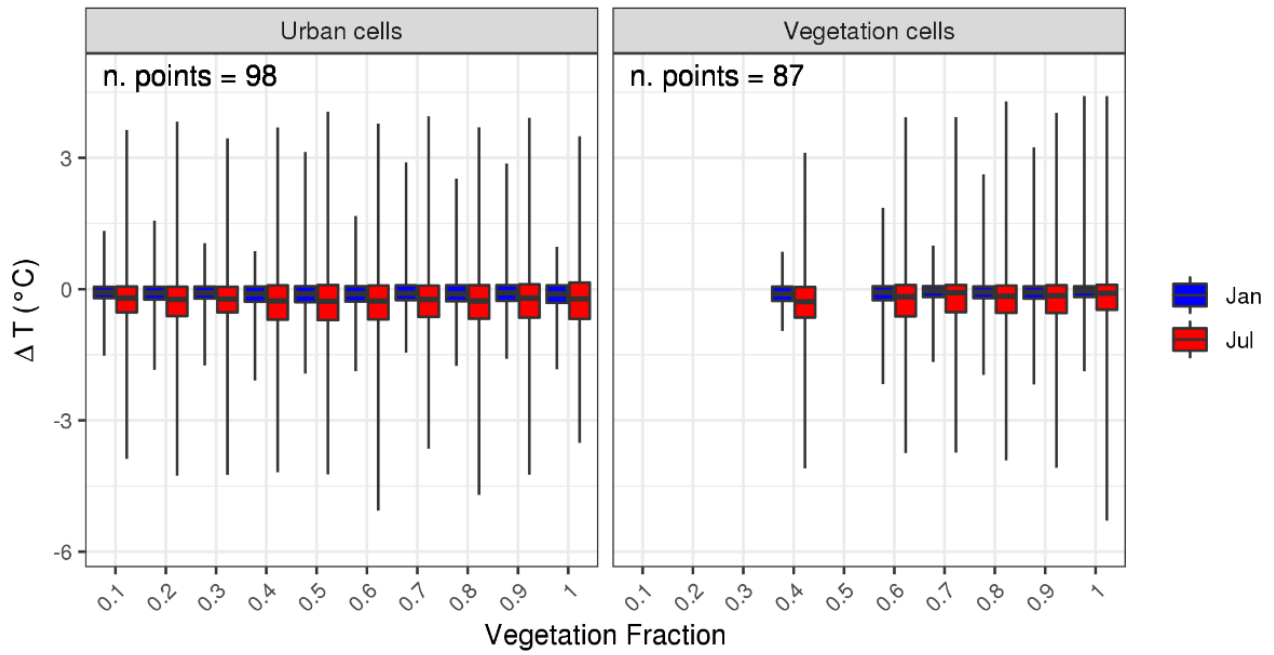

**Figure S6.** Boxplots of hourly T difference (VEG-NOVEG) as a function of vegetation fraction within the urban cells, divided into urban and vegetation cells, inside the municipality of Bologna. Whiskers span the interval 10<sup>th</sup> to 90<sup>th</sup> percentile. Blue (red) colour refers to January (July).

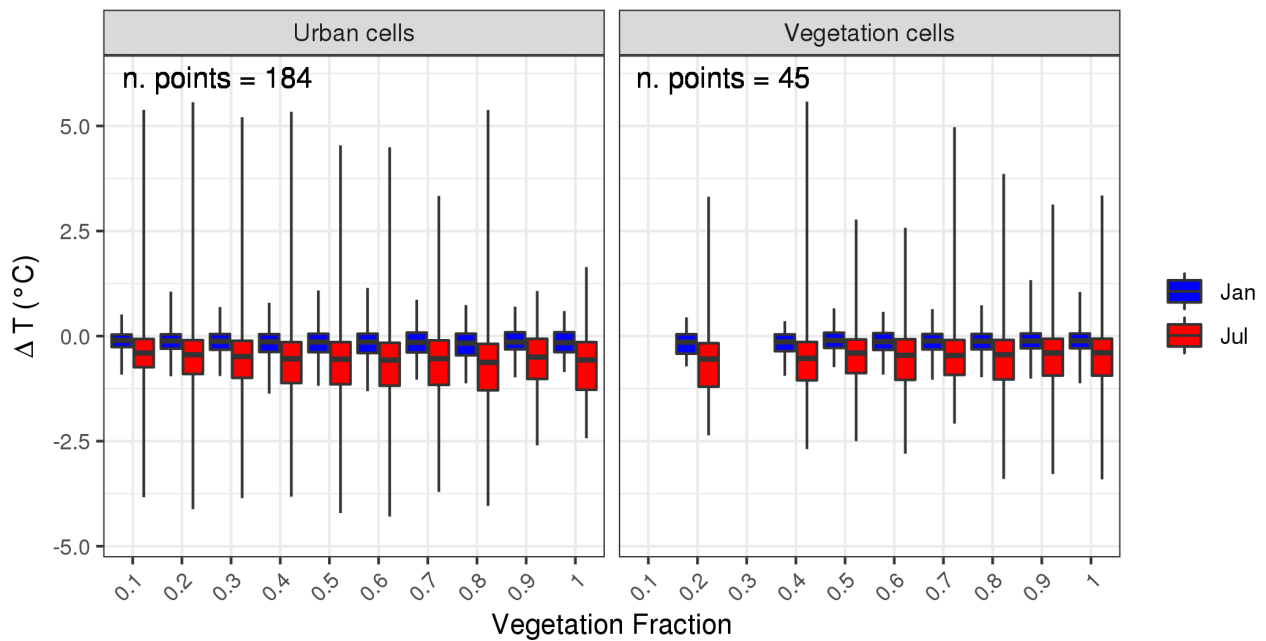

**Figure S7.** Same as in Figure S6 but referred to Milano.

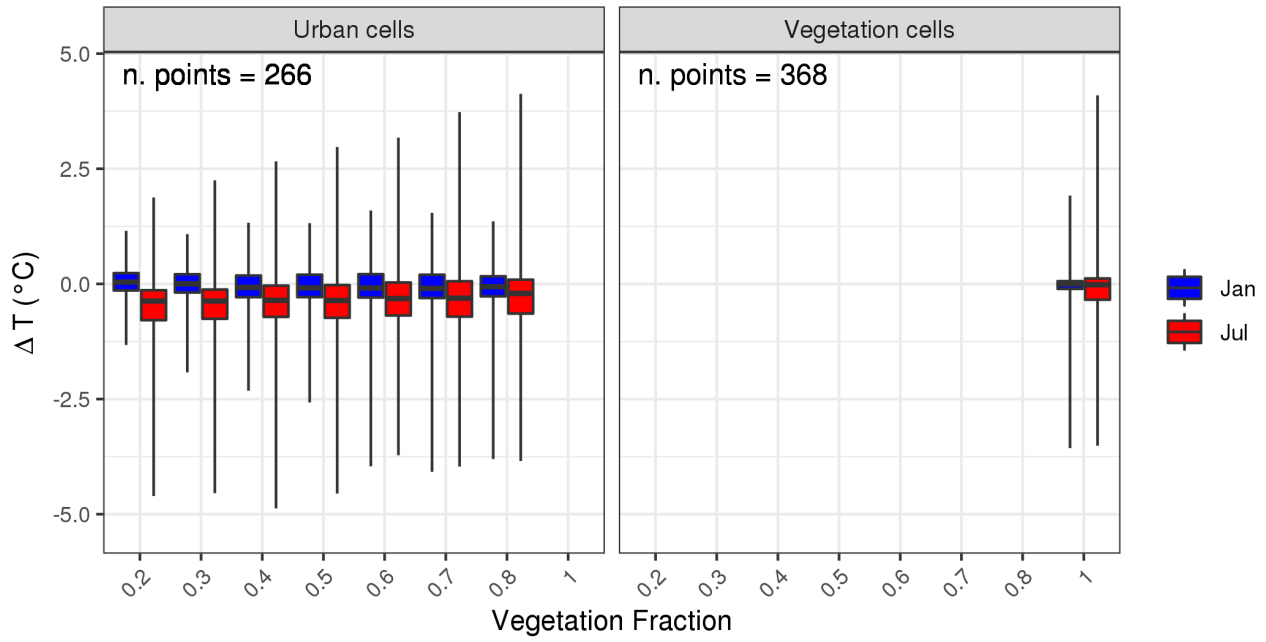

**Figure S8.** Same as in Figure S6 but referred to Madrid.

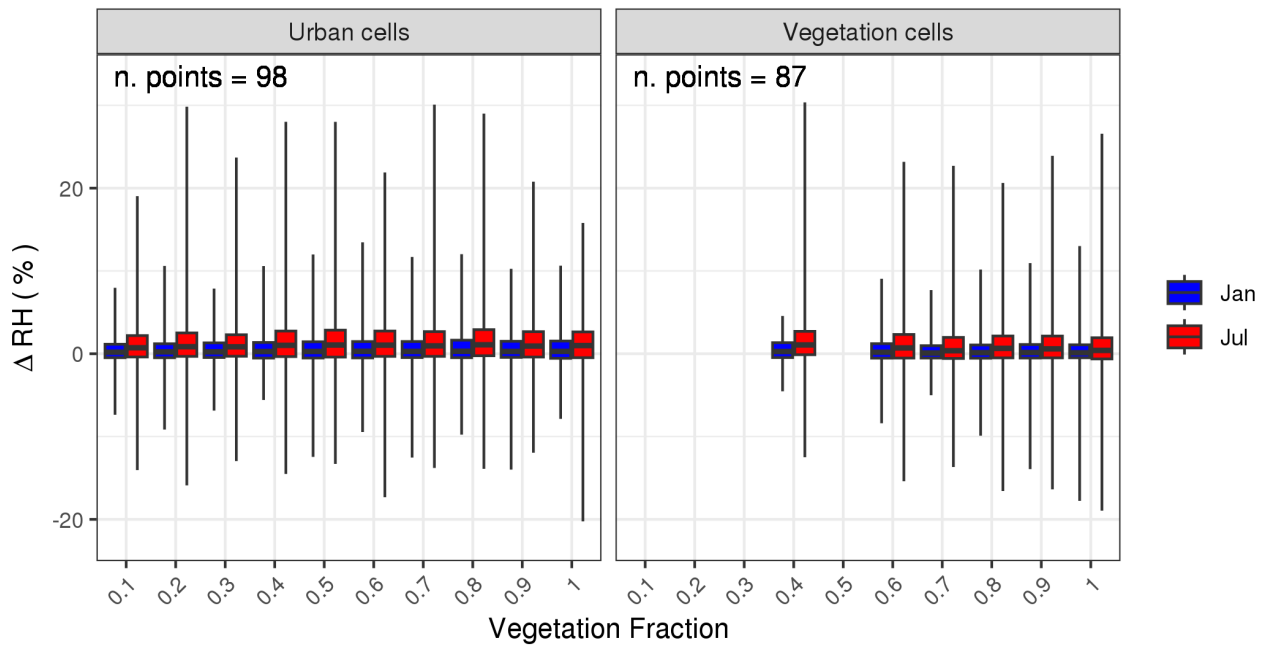

**Figure S9.** Boxplots of hourly RH difference (VEG-NOVEG) as a function of vegetation fraction within the urban cells, divided into urban and vegetation cells, inside the municipality of Bologna. Whiskers span the interval 10<sup>th</sup> to 90<sup>th</sup> percentile. Blue (red) colour refers to January (July). Units in %.

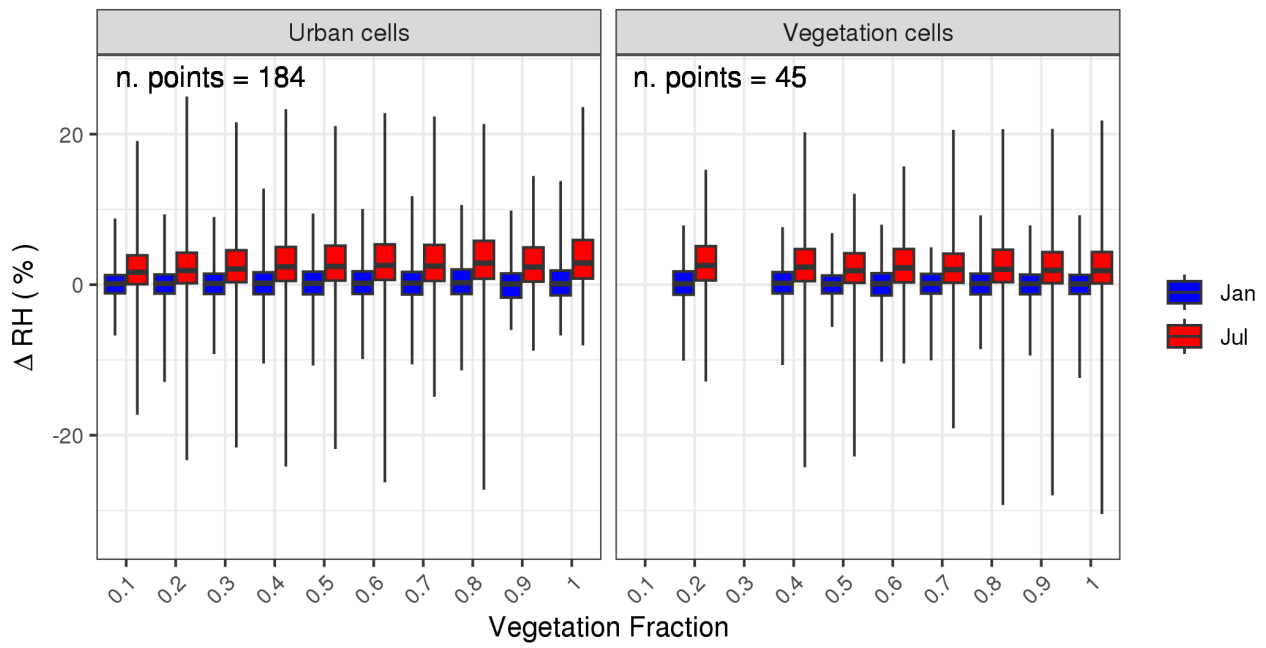

**Figure S10.** Same as in Figure S9 but referred to Milan.

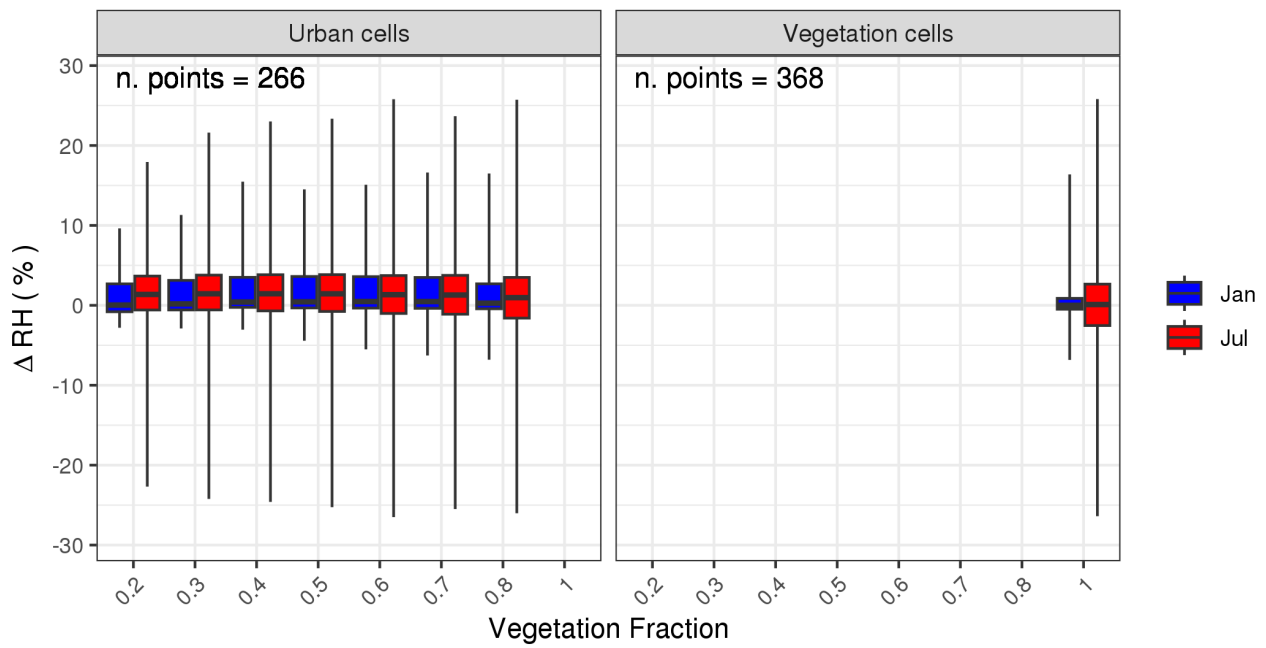

**Figure S11.** Same as in Figure S9 but referred to Madrid.

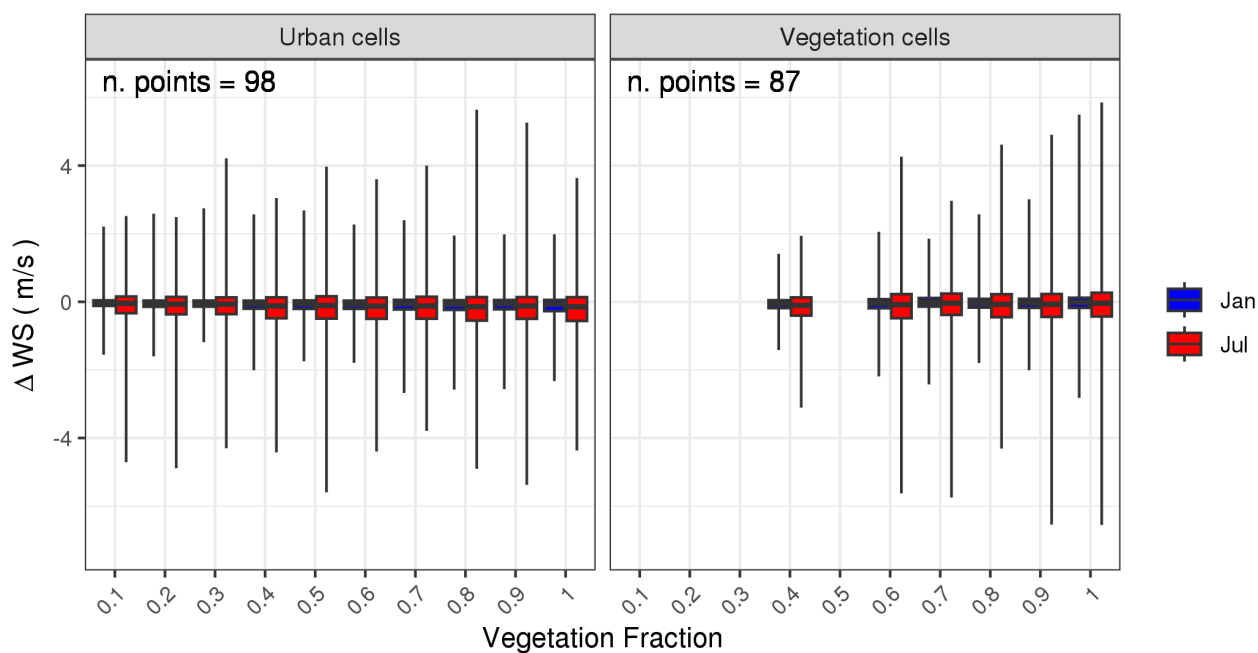

**Figure S12.** Boxplots of hourly wind speed (WS) difference (VEG-NOVEG) as a function of vegetation fraction within the urban cells, divided into urban and vegetation cells, inside the municipality of Bologna. Whiskers span the interval 10<sup>th</sup> to 90<sup>th</sup> percentile. Blue (red) colour refers to January (July).

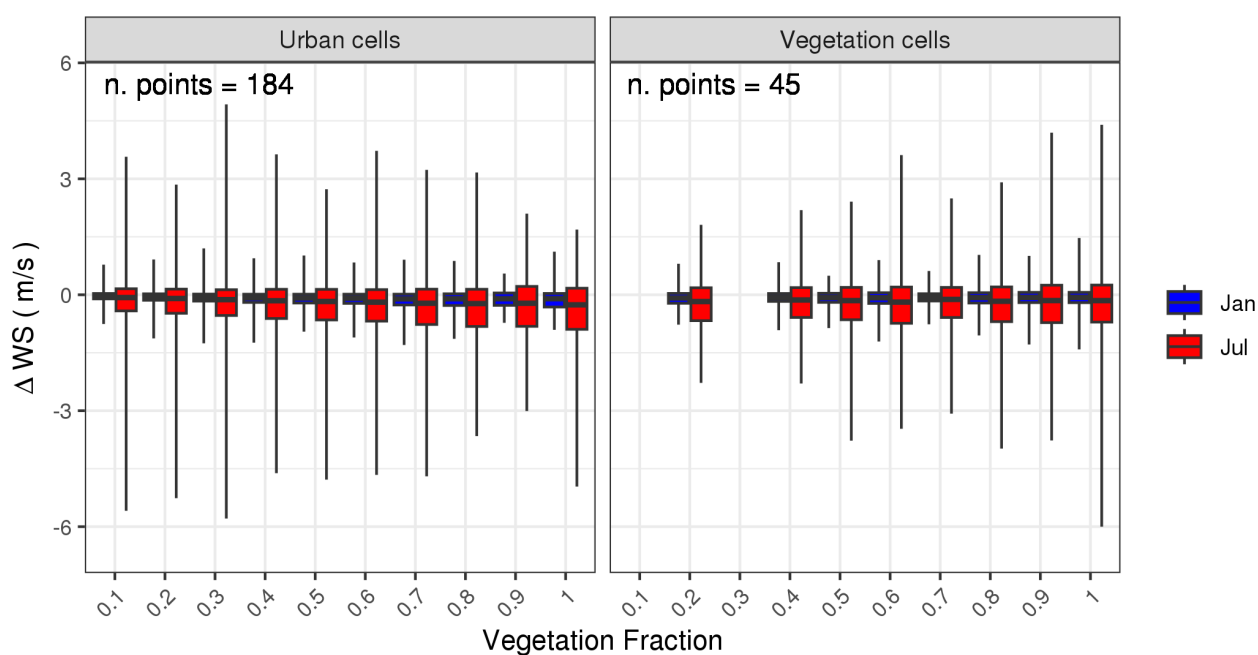

**Figure S13.** Same as in Figure S12 but referred to Milano.

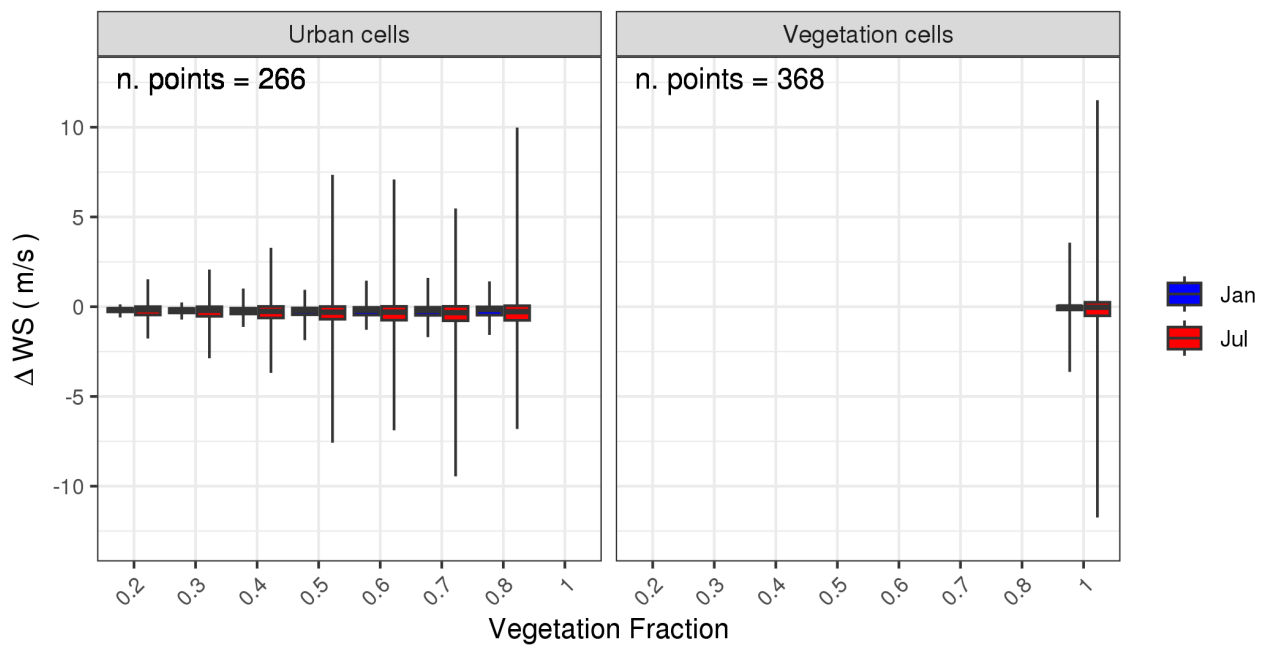

**Figure S14.** Same as in Figure S12 but referred to Madrid.
